# Supplementary material
Source: Frontiers journal article supplement (https://www.frontiersin.org/articles/296515)
Supplement: Image_6.PDF [file Image_6.PDF]

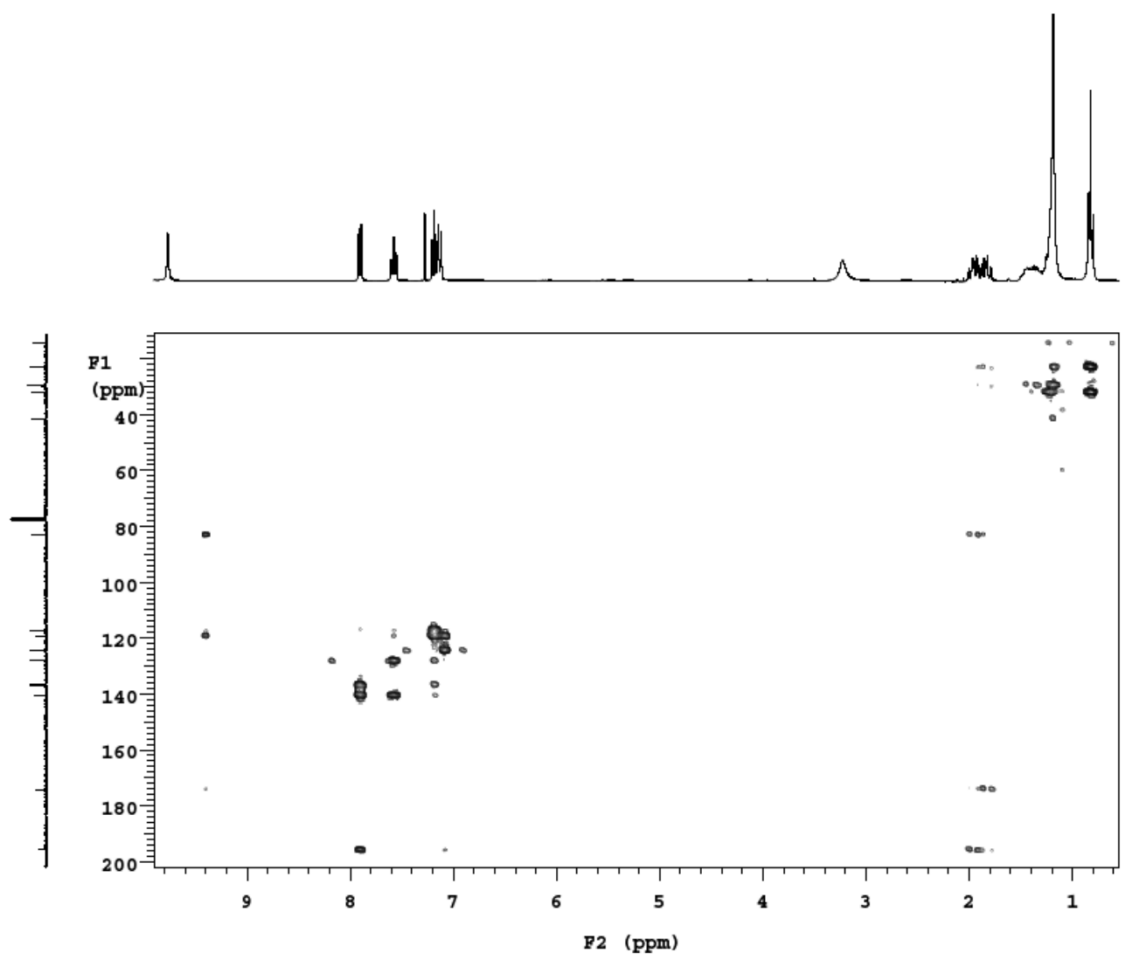

**Figure S6.** HMBC spectrum of compound **1** (300 MHz, CD<sub>3</sub>OD)
