# Supplementary material
Source: Frontiers journal article supplement (https://www.frontiersin.org/articles/296515)
Supplement: Image_9.PDF [file Image_9.PDF]

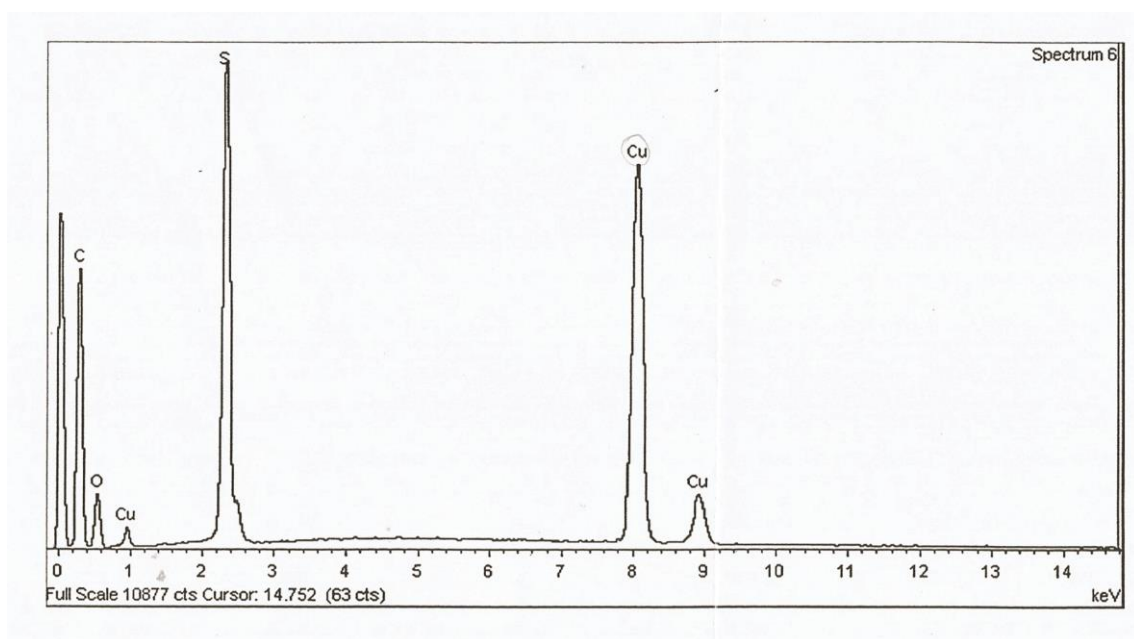

Figure S9: Elemental analysis of organocopper compound by energy-dispersive X-ray spectroscopy (EDS), showing peaks of C, O, Cu and S.
